# Supplementary material for: Instruments to assess quality of life in people with mental health problems: a systematic review and dimension analysis of generic, domain- and disease-specific instruments
Source: PubMed Central journal article supplement (PMC8561965; doi:10.1186/s12955-021-01883-w), 2021-11-02
Supplement: 12955_2021_1883_MOESM1_ESM.pdf [file 12955_2021_1883_MOESM1_ESM.pdf]

## Additional file 1 - Search strategies

### Embase

('quality of life'/mj/exp OR 'quality of life assessment'/mj/exp OR ((quality NEAR/3 life) OR qol):ti) AND ('mental health'/mj/exp OR 'psychiatry'/mj/exp OR 'Diagnostic and Statistical Manual of Mental Disorders'/mj/exp OR 'mental disease'/exp/mj OR 'sexual deviation'/mj OR (((mental\* OR psychic\*) NEAR/3 (health\* OR disorder\* OR ill\*)) OR (mood NEAR/3 disorder\*) OR (obsessi\* NEAR/3 compuls\*) OR dsm OR psychiatr\* OR schizo\* OR bipolar OR unipolar OR ((posttrauma\* OR trauma\*) NEAR/3 stress) OR ptsd OR ((dissociati\* OR somatoform\* OR eating OR personalit\* OR psychosexual\* OR behav\* OR psychosocial\*) NEAR/3 disorder\*) OR (multiple NEAR/3 personalit\*) OR anorex\* OR bulemi\* OR addict\* OR ((drug\* OR alcohol\* OR substance\*) NEAR/3 (depend\* OR misuse OR abuse)) OR borderlin\* OR depressi\* OR anxi\* OR panic OR (Diagnos\* NEAR/3 Statistic\* NEAR/3 Manual\*) OR 'sexual\* deviat\*' OR paraphil\* OR psychosis OR psychoses OR psychotic OR phobia\*):ti) NOT ([Conference Abstract]/lim OR [Letter]/lim OR [Note]/lim OR [Editorial]/lim) AND [english]/lim NOT (cancer\* OR malign\* OR neoplas\* OR hiv OR aids OR diabet\* OR dement\* OR cardiac\* OR myocard\* OR surg\* OR postsurg\* OR postoperat\* OR stroke\* OR cva):ti) NOT ((j uvenile/exp OR (child\* OR infan\* OR adolescen\*):ab,ti) NOT (adult/exp OR (adult\* OR elderl\*):ab,ti))

### Medline (Ovid)

(\* quality of life/ OR ((quality ADJ3 life) OR qol).ti.) AND (\* exp mental health/ OR \* exp psychiatry/ OR \* Diagnostic and Statistical Manual of Mental Disorders/ OR \* exp Mental Disorders/ OR (((mental\* OR psychic\* ) ADJ3 (health\* OR disorder\* OR ill\*)) OR (mood ADJ3 disorder\*) OR (obsessi\* ADJ3 compuls\*) OR dsm OR psychiatr\* OR schizo\* OR bipolar OR unipolar OR ((posttrauma\* OR trauma\*) ADJ3 stress) OR ptsd OR ((dissociati\* OR somatoform\* OR eating OR personalit\* OR psychosexual\* OR behav\* OR psychosocial\*) ADJ3 disorder\*) OR (multiple ADJ3 personalit\*) OR anorex\* OR bulemi\* OR addict\* OR ((drug\* OR alcohol\* OR substance\*) ADJ3 (depend\* OR misuse OR abuse)) OR borderlin\* OR depressi\* OR anxi\* OR panic OR (Diagnos\* ADJ3 Statistic\* ADJ3 Manual\*) OR sexual\* deviat\* OR paraphil\* OR psychosis OR psychoses OR psychotic OR phobia\*).ti.) NOT (letter OR news OR comment OR editorial OR congresses OR abstracts).pt. AND english.la. NOT (cancer\* OR malign\* OR neoplas\* OR hiv OR aids OR diabet\* OR dement\* OR cardiac\* OR myocard\* OR surg\* OR postsurg\* OR postoperat\* OR stroke\* OR

cva).ti. NOT ((exp child/ OR exp infant/ OR adolescent/ OR (child\* OR infan\* OR adolescen\*).ab,ti.) NOT (exp adult/ OR (adult\* OR elderl\*).ab,ti.))

### **PsycINFO Ovid**

(\* "quality of life"/ OR ((quality ADJ3 life) OR qol).ti.) AND (\* exp mental health/ OR \* exp psychiatry/ OR \* exp Mental Disorders/ OR (((mental\* OR psychic\* ) ADJ3 (health\* OR disorder\* OR ill\*)) OR (mood ADJ3 disorder\*) OR (obsessi\* ADJ3 compuls\*) OR dsm OR psychiatr\* OR schizo\* OR bipolar OR unipolar OR ((posttrauma\* OR trauma\*) ADJ3 stress) OR ptsd OR ((dissociati\* OR somatoform\* OR eating OR personalit\* OR psychosexual\* OR behav\* OR psychosocial\*) ADJ3 disorder\*) OR (multiple ADJ3 personalit\*) OR anorex\* OR bulemi\* OR addict\* OR ((drug\* OR alcohol\* OR substance\*) ADJ3 (depend\* OR misuse OR abuse)) OR borderlin\* OR depressi\* OR anxi\* OR panic OR (Diagnos\* ADJ3 Statistic\* ADJ3 Manual\*) OR sexual\* deviat\* OR paraphil\* OR psychosis OR psychoses OR psychotic OR phobia\*).ti.) NOT (letter OR news OR comment OR editorial OR congresses OR abstracts).pt. AND english.la. NOT (cancer\* OR malign\* OR neoplas\* OR hiv OR aids OR diabet\* OR dement\* OR cardiac\* OR myocard\* OR surg\* OR postsurg\* OR postoperat\* OR stroke\* OR cva).ti. NOT ((100.ag. OR 200.ag. OR (child\* OR infan\* OR adolescen\*).ab,ti.) NOT (300.ag. OR (adult\* OR elderl\*).ab,ti.))
