# Supplementary material for: Instruments to assess quality of life in people with mental health problems: a systematic review and dimension analysis of generic, domain- and disease-specific instruments
Source: PubMed Central journal article supplement (PMC8561965; doi:10.1186/s12955-021-01883-w), 2021-11-02
Supplement: 12955_2021_1883_MOESM2_ESM.pdf [file 12955_2021_1883_MOESM2_ESM.pdf]

## **Additional file 2 – Dimensions and underlying themes of quality of life that are important to people with mental health problems (Connell et al. 2014)**

### **1. WELL-BEING/ILL-BEING**

- Distress/subjective experience of symptoms
- Experience of psychosis/mania
- Fear/Anxiety/Worry
- Energy/motivation
- Well-Being (positive concepts e.g. enjoyment/ relaxation/stability)

### **2. RELATIONSHIPS AND BELONGING**

- Belonging/being part of the community
- Good relationships
  - . Support
  - . Acceptance/ understanding
  - . Company/camaraderie/shared interests
  - . Love, care and affection
- Difficulties forming and maintaining relationships
- Stigma
- Feeling normal
- Loneliness/Isolation, alienation

### **3. ACTIVITY**

- Activity general
- Employment
- Meaningful/enjoyable/suited to needs
- Routine and structure

### **4. SELF-PERCEPTION**

- Self-identity/sense of self
- Self-efficacy
- Self-esteem
- Self-acceptance/self-stigma

### **5. AUTONOMY**

- Control (general)
- Symptom control/management
- Information and understanding of illness
- Choice (general)
- Choice - related to limited finances
- Choice - related to job opportunities
- Independence/dependence
- Personal strength, determination, self sufficiency

**6. HOPE AND HOPELESSNESS**

- Hope/hopelessness
- Goals/personal achievement
- Hope and Hopelessness
- Loss and effect of past experiences

**7. PHYSICAL HEALTH**
